# Supplementary material
Source: PubMed Central journal article supplement (PMC3140571)
Supplement: NIHMS298285-supplement-1.pdf [file NIHMS298285-supplement-1.pdf]

Supplemental material

**Table 1: Eligible VHA Clinics from which post-discharge BP measurements were used for follow-up**

---

Coumadin clinic

Diabetes, Endocrine/ metabolism

General internal medicine; Primary care/medicine; Women's Clinic

Geriatrics clinic; Geriatric evaluation and Management; Geriatric primary care

Hypertension; High Blood pressure clinic

Cardiology

Infectious disease

Mental health primary care

Renal/ Nephrology

Pulmonary Medicine/ chest clinic

Neurology

---

**Table 2: Comparison of patients included in sample of post discharge BP control (n=2054) to those excluded because of no outpatient visit or no post discharge BP measure (n=1105)**

|                                                         | <i>Post DC Sample</i><br><i>N=2054</i> | <i>Missing Post DC BP</i><br><i>N=1105</i> | <i>p-value</i>   |
|---------------------------------------------------------|----------------------------------------|--------------------------------------------|------------------|
| <b>Gender</b>                                           |                                        |                                            |                  |
| Males                                                   | 2000(97.4)                             | 1082(97.9)                                 | 0.3412           |
| Females                                                 | 54(2.6)                                | 23(2.1)                                    |                  |
| <b>Age</b>                                              |                                        |                                            |                  |
| <65                                                     | 1040(50.6)                             | 462(41.8)                                  | <b>&lt;.0001</b> |
| 65- 74                                                  | 449(21.8)                              | 256(23.2)                                  |                  |
| 75+                                                     | 565(27.6)                              | 387(35.0)                                  |                  |
| <b>Race</b>                                             |                                        |                                            |                  |
| White                                                   | 1265(66.0)                             | 691(68.3)                                  | 0.2565           |
| Black                                                   | 500(26.2)                              | 256(25.3)                                  |                  |
| Other                                                   | 150(7.8)                               | 64(6.3)                                    |                  |
| Missing race                                            | 139                                    | 94                                         |                  |
| <b>NIH stroke scale</b>                                 |                                        |                                            |                  |
| 0-2                                                     | 1152(56.0)                             | 483(43.7)                                  | <b>&lt;.0001</b> |
| 3-9                                                     | 808(39.4)                              | 459(41.5)                                  |                  |
| 10 +                                                    | 94(4.6)                                | 163(14.8)                                  |                  |
| <b>Weight (mean ±SD )</b>                               | 193.75 ± 44.17                         | 183.56 ± 41.70                             | <b>&lt;.0001</b> |
| <b>Current Smoker (%)</b>                               | 752(36.6)                              | 387(35.0)                                  | 0.3751           |
| <b>Charlson Score (mean ±SD)</b>                        | 4.5 ± 1.9                              | 4.8 ± 2.0                                  | <b>&lt;.0001</b> |
| <b>Number of Co morbidities at admission (mean ±SD)</b> | 3.5 ± 2.0                              | 3.4 ± 2.1                                  | 0.1249           |
| <b>Co morbidities (%)</b>                               |                                        |                                            |                  |
| Cerebrovascular disease *                               | 552(26.8)                              | 352(31.9)                                  | <b>0.0031</b>    |
| Cardiovascular disease †                                | 723(35.2)                              | 404(36.6)                                  | 0.4462           |
| Atrial Fibrillation                                     | 290(14.2)                              | 181(16.4)                                  | 0.0888           |
| Diabetes                                                | 866(42.2)                              | 399(36.1)                                  | <b>0.0009</b>    |
| Hyperlipidemia                                          | 1091(53.2)                             | 438(39.6)                                  | <b>&lt;.0001</b> |
| Renal disease                                           | 22(1.0)                                | 8(0.7)                                     | 0.3374           |
| Liver disease                                           | 46(2.2)                                | 12(1.1)                                    | <b>0.0213</b>    |

|                                                 |                  |                  |                  |
|-------------------------------------------------|------------------|------------------|------------------|
| HIV                                             | 14(0.6)          | 7(0.6)           | 0.8739           |
| Cancer ‡                                        | 130(6.4)         | 86(7.8)          | 0.1226           |
| Pulmonary disease                               | 312(15.2)        | 166(15.0)        | 0.9004           |
| Use of antipsychotic medication                 | 102(5.0)         | 55(5.0)          | 0.9887           |
| Depression                                      | 358(17.4)        | 158(14.3)        | <b>0.0232</b>    |
| Dementia                                        | 106(5.2)         | 119(10.8)        | <b>&lt;.0001</b> |
| Peptic Ulcer disease                            | 36(1.8)          | 18(1.6)          | 0.7981           |
| Rheumatologic Disorders§                        | 8(0.4)           | 8(0.7)           | 0.2066           |
| <b>N medications at admission</b><br>(mean ±SD) | <b>7.4 ± 4.9</b> | <b>6.2 ± 4.7</b> | <b>&lt;.0001</b> |
| <b>Discharged disposition (%)</b>               |                  |                  | <b>&lt;.0001</b> |
| Home                                            | 1637(79.6)       | 592(53.6)        |                  |
| Nursing Facility                                | 183 (8.9)        | 259 (23.4)       |                  |
| Transfer to short term hospital                 | 19 (0.9)         | 26 (2.4)         |                  |
| Federal Health Care Facility                    | 90 (4.4)         | 113 (10.2)       |                  |
| Intermediate Care Facility                      | 30 (1.5)         | 51 (4.6)         |                  |
| Other Health Care Institution                   | 20 (1.0)         | 8 (0.7)          |                  |
| Inpatient rehabilitation                        | 72 (3.5)         | 50 (4.5)         |                  |
| Medicare long term care                         | 2 (0.1)          | 4 (0.4)          |                  |
| Psychiatric Hospital                            | 0 (0.0)          | 1 (0.1)          |                  |
| Critical Access Hospital                        | 1 (0.0)          | 1 (0.1)          |                  |

\*Cerebrovascular disease includes carotid endarterectomy, carotid stent, ischemic stroke or TIA

† Cardiovascular disease includes history of coronary artery disease, acute myocardial infarction, coronary artery bypass, percutaneous transluminal coronary angioplasty with or without stent placement or any history of peripheral vascular disease

‡ Cancer includes any diagnosis of leukemia, lymphoma, or any solid tumor in past 5 years, metastatic tumor, or multiple myeloma

|| Antipsychotics include chlorpromazine; fluphenazine; thioridazine; trifluoroperazine; thiothixene; aripiprazole; clozapine; haloperidol; loxapine; molindone; olanzapine; quetiapine; risperidone; ziprasidone

§ Rheumatologic disorders include Lupus and any vasculitis

**Table 3: Subgroup Analysis--Odds of BP control at discharge follow up visit among the sample of patients with uncontrolled BP at hospital discharge (n=885 in 123 VAMCs)**

|                                                  | <i>BP uncontrolled</i><br><i>N=360</i> | <i>BP controlled</i><br><i>N=525</i> | <i>Unadjusted OR</i><br><i>(95% CI)</i> | <i>Adjusted OR†</i><br><i>(95%CI)</i> |
|--------------------------------------------------|----------------------------------------|--------------------------------------|-----------------------------------------|---------------------------------------|
| <b>Gender</b>                                    |                                        |                                      |                                         |                                       |
| Male                                             | 97.6                                   | 97.3                                 | Ref                                     | Ref                                   |
| Female                                           | 2.6                                    | 2.7                                  | 1.07 (0.45, 2.52)                       | 0.99 (0.38, 2.56)                     |
| <b>Age</b>                                       | 53.0                                   | 46.7                                 | Ref                                     | Ref                                   |
| <65                                              |                                        |                                      |                                         |                                       |
| 65-74                                            | 23.4                                   | 23.4                                 | 1.14 (0.81, 1.60)                       | 1.11 (0.76, 1.62)                     |
| 75+                                              | 23.6                                   | 29.9                                 | <b>1.44 (1.04, 2.00)</b>                | 1.07 (0.72, 1.59)                     |
| <b>Race*</b>                                     |                                        |                                      |                                         |                                       |
| White                                            | 55.0                                   | 67.0                                 | Ref                                     | Ref                                   |
| Black                                            | 34.8                                   | 27.2                                 | <b>0.64 (0.47, 0.88)</b>                | 0.80 (0.56, 1.14)                     |
| Other                                            | 10.2                                   | 5.8                                  | <b>0.46 (0.27, 0.79)</b>                | <b>0.49 (0.28, 0.86)</b>              |
| <b>N co-morbidities at admission (mean± SD)</b>  | 3.4 ± 1.9                              | 3.6 ± 2.0                            | 1.04 (0.97, 1.12)                       | 1.16 (1.00, 1.34)                     |
| <b>Co-morbidities</b>                            |                                        |                                      |                                         |                                       |
| Cerebrovascular disease                          | 24.4                                   | 31.4                                 | <b>1.42 (1.04, 1.92)</b>                | 1.25 (0.85, 1.83)                     |
| CVD                                              | 33.0                                   | 33.5                                 | 1.02 (0.77, 1.36)                       | 0.78 (0.51, 1.21)                     |
| Diabetes                                         | 50.8                                   | 42.1                                 | <b>0.70 (0.54, 0.92)</b>                | <b>0.68 (0.47, 0.96)</b>              |
| Hypertension                                     | 90.2                                   | 84.4                                 | <b>0.58 (0.38, 0.89)</b>                | <b>0.56 (0.34, 0.93)</b>              |
| Hyperlipidemia                                   | 50.8                                   | 53.5                                 | 1.11 (0.85, 1.46)                       | 0.94 (0.66, 1.33)                     |
| <b>Systolic BP at Discharge mmHg (mean± SD)</b>  | 157.0 ± 15.6                           | 152.4 ± 12.8                         | <b>0.98 (0.97, 0.99)</b>                | <b>0.98 (0.97, 0.99)</b>              |
| <b>Diastolic BP at Discharge mmHg (mean± SD)</b> | 86.5 ± 12.6                            | 82.5 ± 12.1                          | <b>0.97 (0.96, 0.98)</b>                | <b>0.98 (0.96, 0.99)</b>              |
| <b>N Visits Post Discharge (mean± SD)</b>        | 5.8 ± 4.6                              | 6.0 ± 4.6                            | 1.01 (0.98, 1.04)                       | 1.01 (0.98, 1.04)                     |
| <b>Antihypertensives at DC</b>                   |                                        |                                      |                                         |                                       |
| Thiazide + ACE/ ARB                              | 21.2                                   | 21.0                                 | 0.99 (0.71, 1.38)                       | 1.22 (0.79, 1.89)                     |
| Thiazide                                         | 6.4                                    | 6.5                                  | 1.01 (0.58, 1.76)                       | 1.10 (0.57, 2.11)                     |
| ACE/ARB                                          | 41.4                                   | 40.6                                 | 0.97 (0.73, 1.27)                       | 1.03 (0.72, 1.48)                     |
| Beta Blockers                                    | 55.2                                   | 48.0                                 | <b>0.75 (0.57, 0.98)</b>                | 0.80 (0.58, 1.11)                     |

|                   |      |      |                   |                   |
|-------------------|------|------|-------------------|-------------------|
| CCB               | 37.8 | 32.2 | 0.78 (0.59, 1.04) | 0.85 (0.62, 1.18) |
| All other classes | 35.6 | 31.4 | 0.83 (0.62, 1.11) | 0.79 (0.57, 1.09) |

\* Missing race: BP uncontrolled N= 29 (8.1%); BP controlled N=43 (8.2%)

† Adjusted model (n=813) includes gender, age, race, history of CVD, cerebrovascular disease, Diabetes, Hypertension, Hyperlipidemia, number of co- morbidities at admission, Systolic and Diastolic BP at Discharge, number of visits since hospital discharge, Class of antihypertensive drugs prescribed at discharge with facility as a random effect (N=121)
